# Supplementary material
Source: PubMed Central journal article supplement (PMC10514223)
Supplement: NIHMS1885269-supplement-fS2.pdf [file NIHMS1885269-supplement-fS2.pdf]

# Sequence of 5' LoxP insertion in intron 1 of mouse *Egr1* gene

TGTCGCGCGCCTTGTGTTGTCAGATTGTTCCCCAAGGCAGGGCTGAAATCTGTGACCAAGGATGTCCCGCCGCCAGATAACTTCGTATAGCATACATTATACGAAGTTATG  
 ACAAGCGCGCGGAACAAACGTCTAACAAAGGGGTTCCGTCCTGACTTTAGACACTGGTCCCTACAAGGCGGGCGGGTCTATTGAAGCATATCGTATGTAATATGCTTCAATAC

Egr1 5' asym oligo

LoxP

GTCGGGGGCGCGCATTAGCTGTAGCCACTAGGGTGCTGCGGGGATTCCCTCGCCCGCGCAGCCTCGCTGCGGAGCGCTCTCGGAGCTGCAGTAGAGGGGGGATTCTCTGT  
 CAGCCCCCGCGCGTAATCGACATCGGTGATCCCACGACCGCCCTAAGGGAGCGGGCGCGTCTGGAGCGACGCCTCGCGAGAGCCTCGACGTATCTCCCCCTAAGAGACA

TTGCGTCAGCTGTTGAAATGGG 3'  
 AACGCACTCGACAACCTTACCC 5'

ACGCACTCGACAACCTTACCC

R1 primer

1 TGTCGCGCGCCTTGTGTTGTCAGATTGTTCCCCAAGGCAGGGCTGAAATCTGTGACCAAGGATGTCCCGCCGCCAGATAACTTCGTATAGCATACATTATACGAAGTTATG  
 2 TGTCGCGCGCCTTGTGTTGTCAGATTGTTCCCCAAGGCAGGGCTGAAATCTGTGACCAAGGATGTCCCGCCGCCAG-----G  
 3 TGTCGCGCGCCTTGTGTTGTCAGATTGTTCCCCAAGGCAGGGCTGAAATCTGTGACCAAGGATGTCCCGCCGCCAGATAACTTCGTATAGCATACATTATACGAAGTTATG

- 1- Predicted sequence of 5' LoxP insertion in intron 1 of mouse *Egr1* gene
- 2- Sequence of corresponding *Egr1* allele in wild type mouse.
- 3- sequence of 5' LoxP insertion in intron 1 of *Egr1* gene of *Egr1<sup>flf</sup>* mouse (F2 generation)

## SUPPORT INFORMATION FIGURE S2

# LoxP insertion sequence 3' from exon 2 of the mouse *Egr1* gene

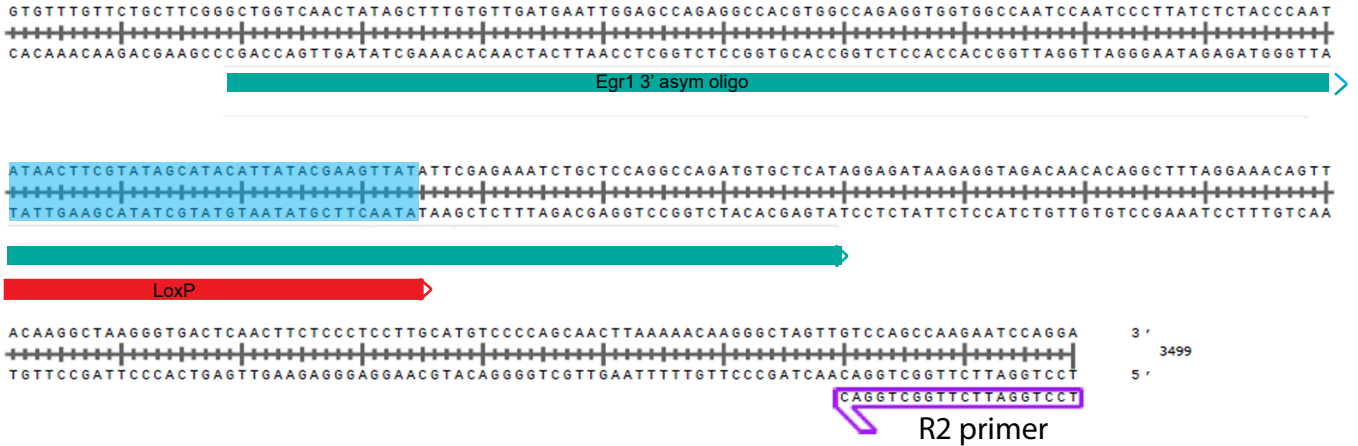

1 ATAACTTCGTATAGC ATACATTATACGAAGTTAT ATTTCGAGAAATCTGCTCCAGGCCAGATGTGCTCATAGGAGATAAAGAGGTAGACAACACAGGCTTTAGGAAACAGTT  
 2 ----- ATTTCGAGAAATCTGCTCCAGGCCAGATGTGCTCATAGGAGATAAAGAGGTAGACAACACAGGCTTTAGGAAACAGTT  
 3 ATAACTTCGTATAGC ATACATTATACGAAGTTAT ATTTCGAGAAATCTGCTCCAGGCCAGATGTGCTCATAGGAGATAAAGAGGTAGACAACACAGGCTTTAGGAAACAGTT

- 1- Predicted sequence of LoxP insertion 3' to the mouse *Egr1* gene
- 2- Sequence of corresponding *Egr1* allele in wild type mouse.
- 3- sequence of LoxP insertion insertion 3' to the mouse *Egr1* gene (F2 generation)
